# Supplementary material
Source: PubMed Central journal article supplement (PMC7384976)

**A**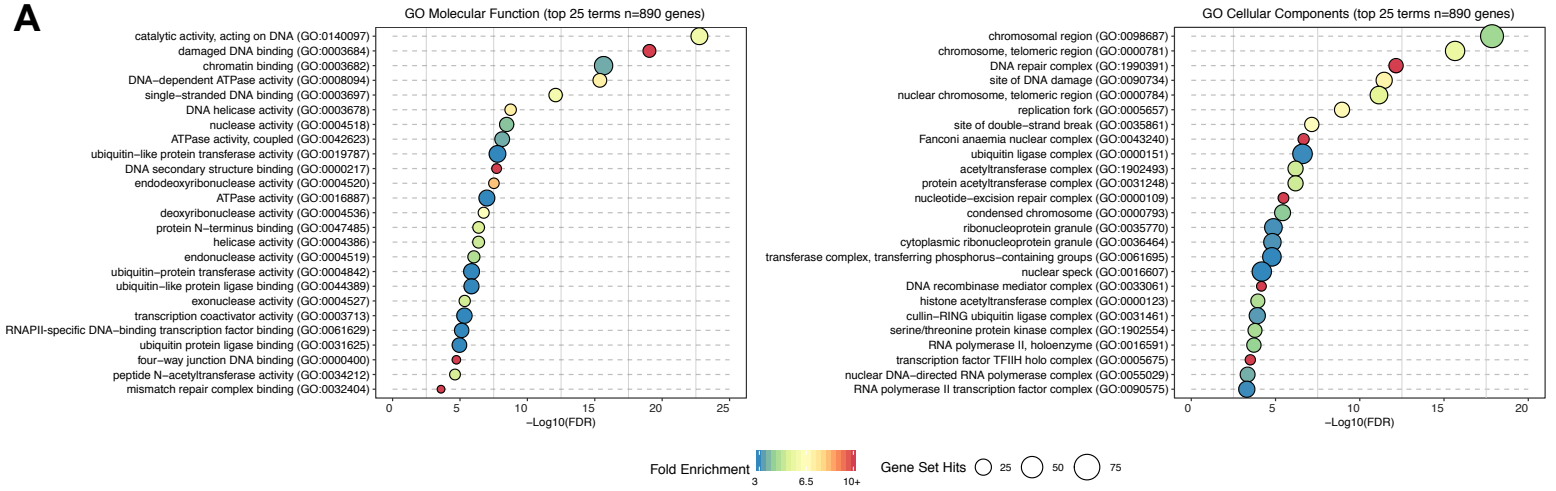**B**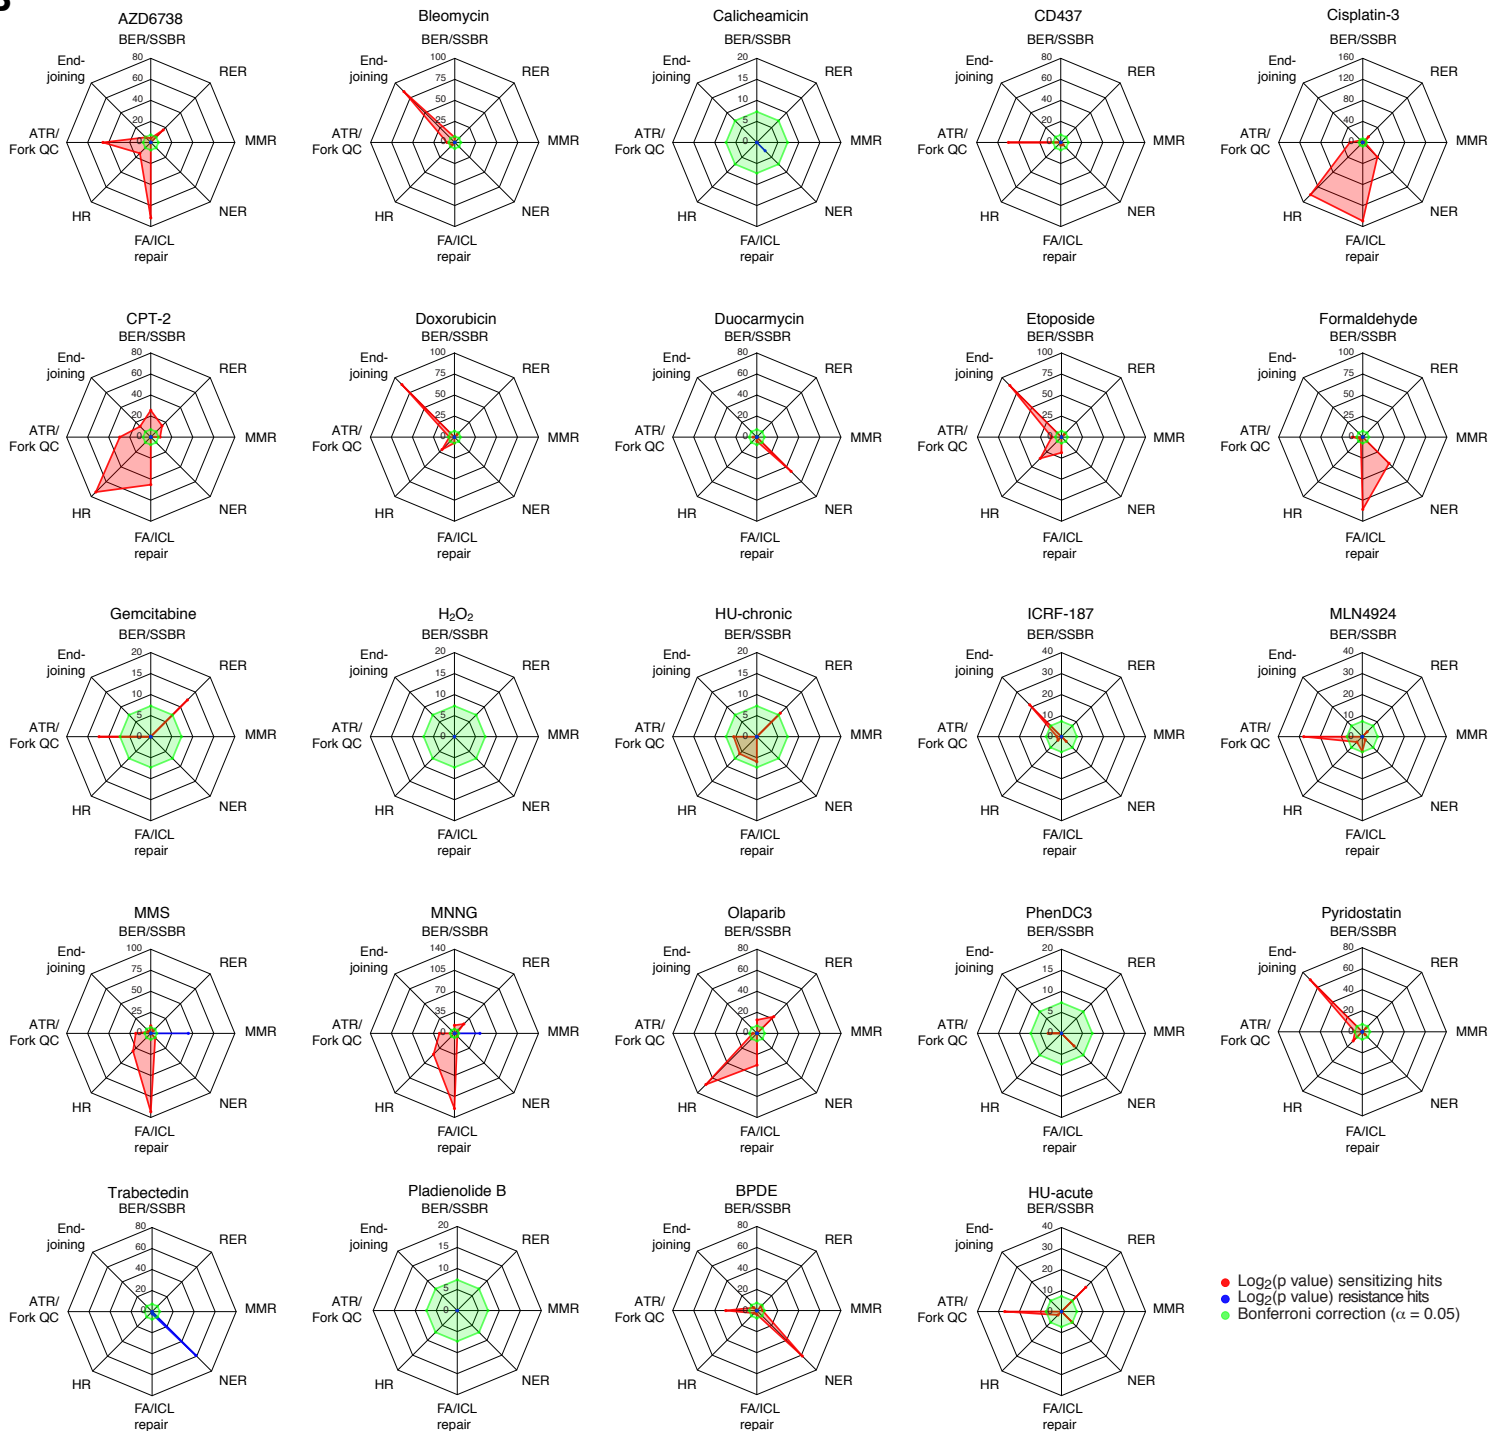**Figure S1**

Supplement: NIHMS1598385-supplement-1.pdf [file NIHMS1598385-supplement-1.pdf]

**A**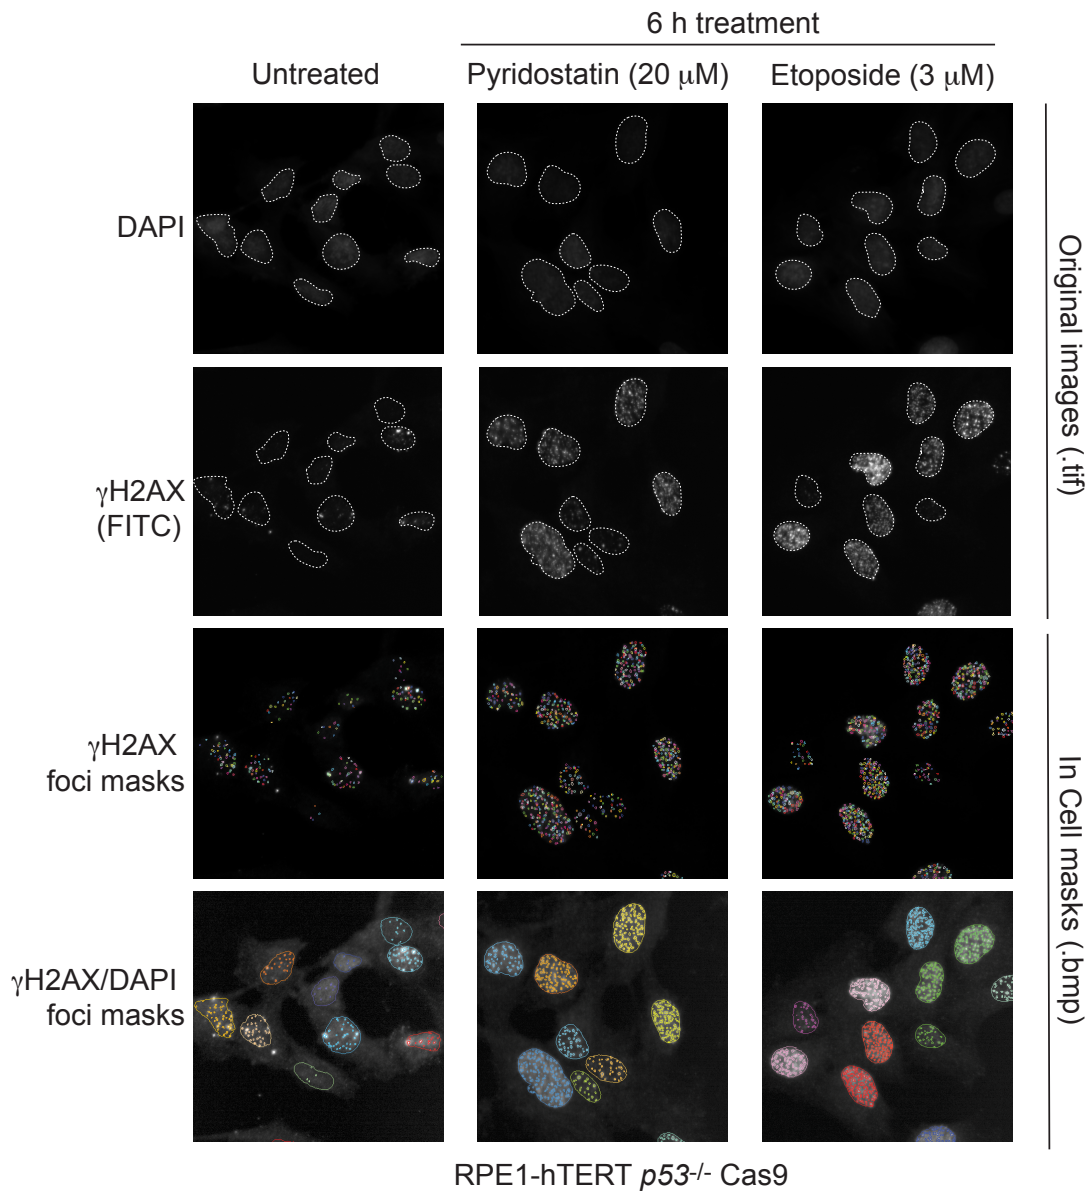**B**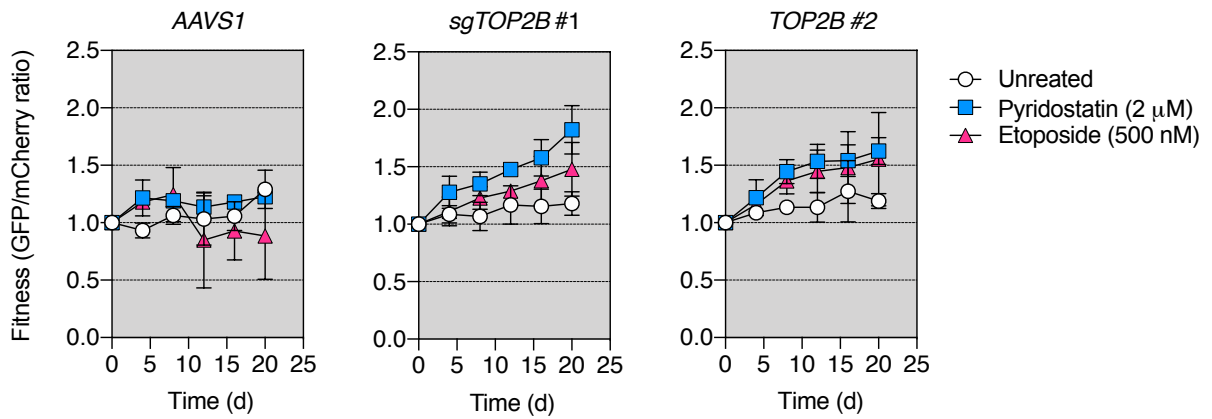**C**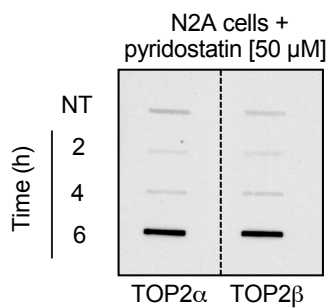

Figure S2

Supplement: NIHMS1598385-supplement-2.pdf [file NIHMS1598385-supplement-2.pdf]

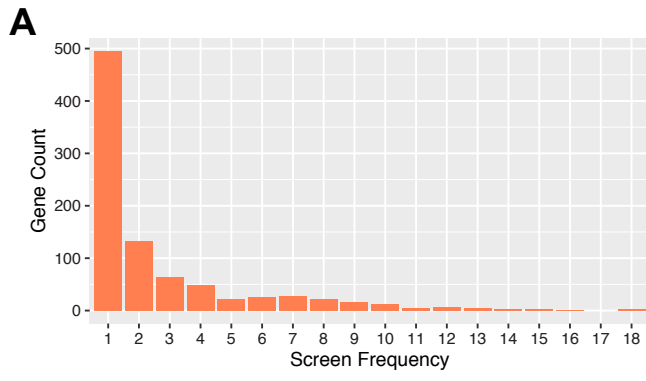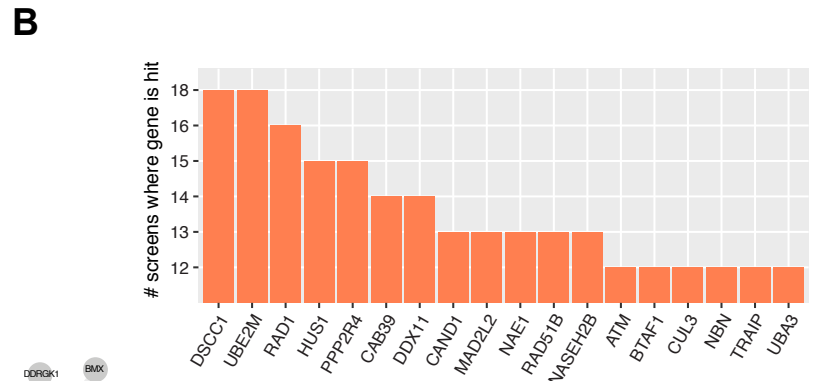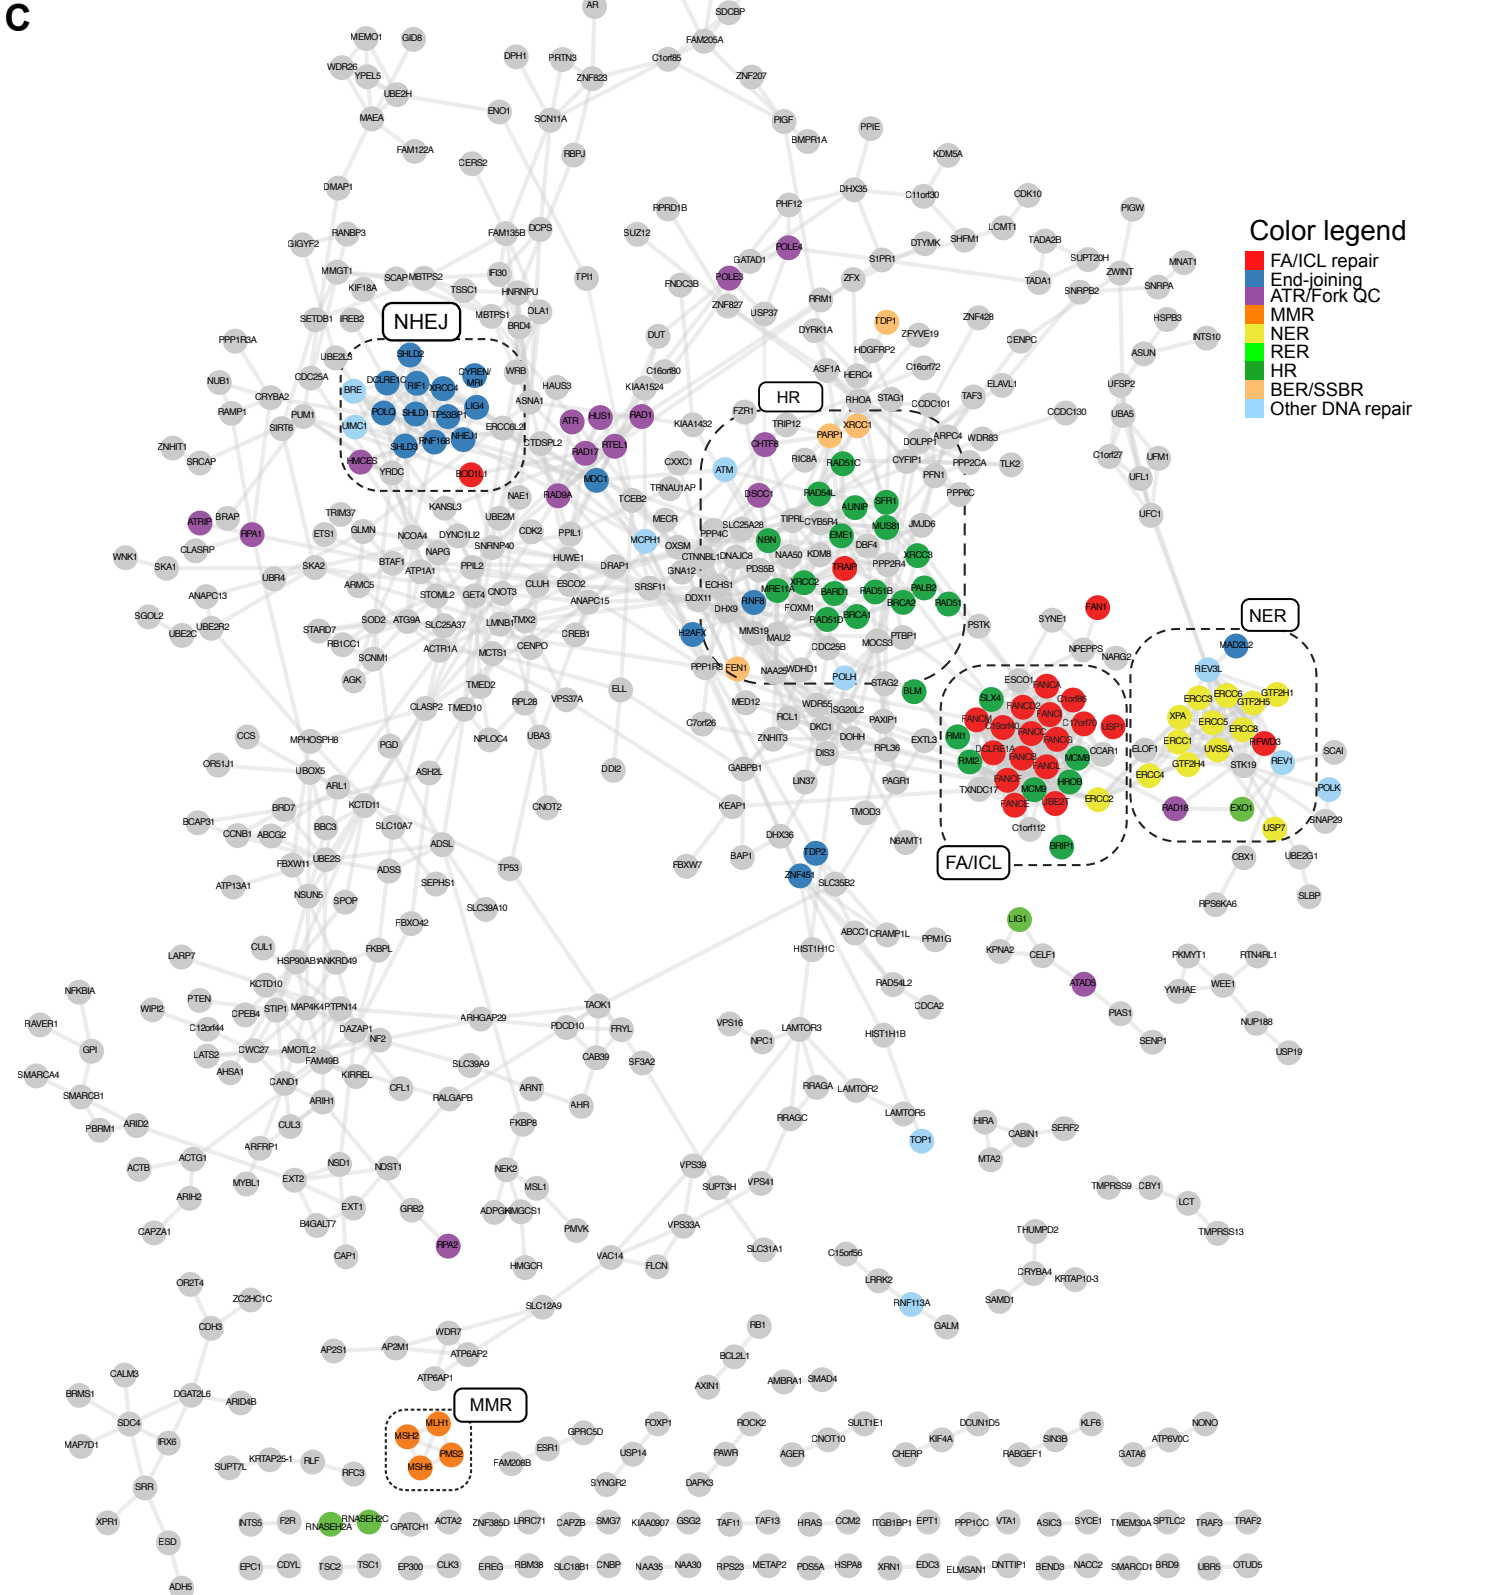

Figure S3

Supplement: NIHMS1598385-supplement-3.pdf [file NIHMS1598385-supplement-3.pdf]

**A**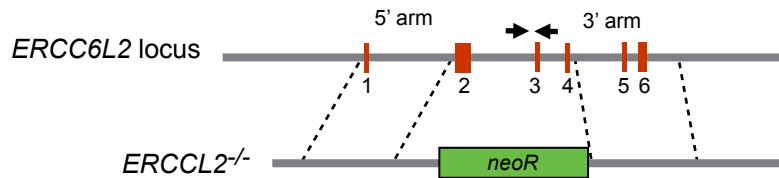**B**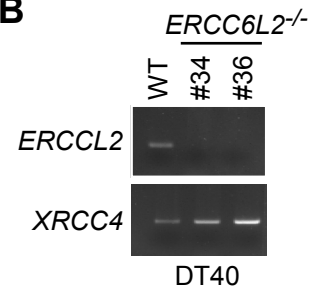**C**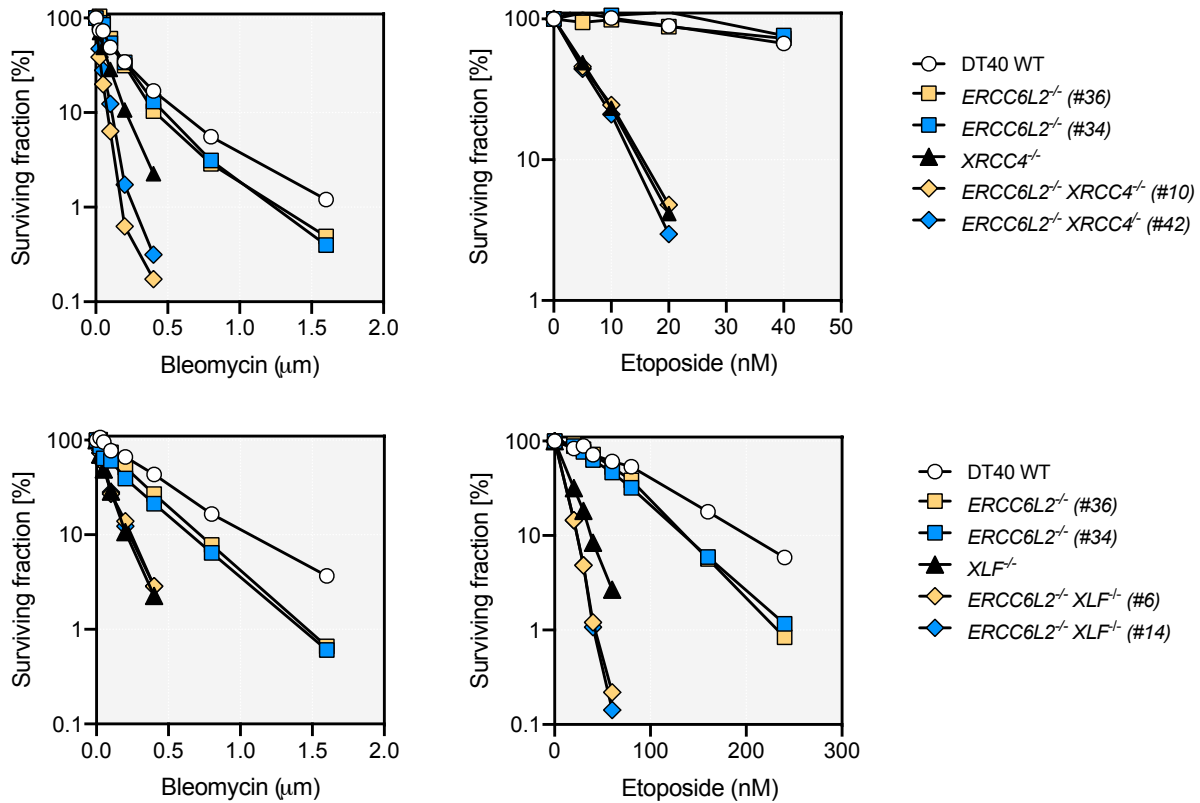**D**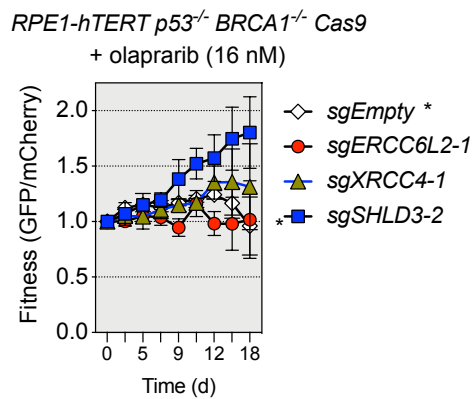**E**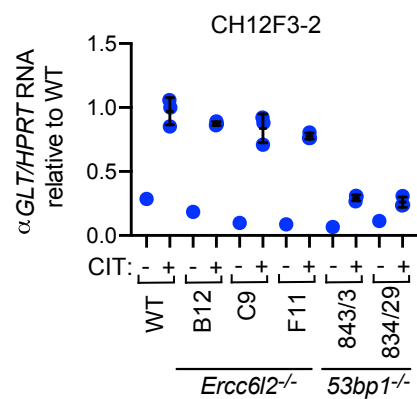**F**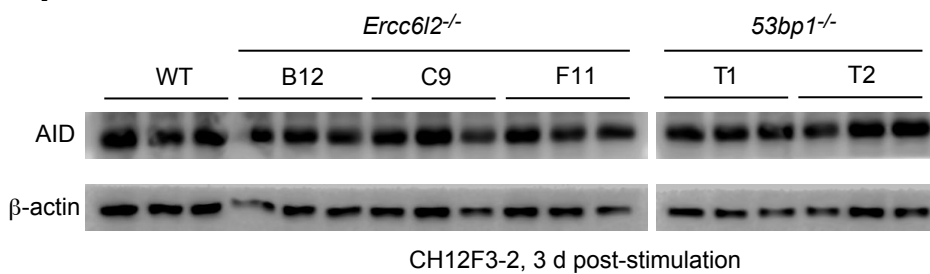**G**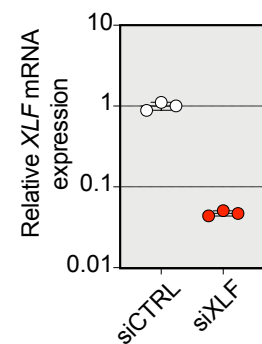

Figure S5

Supplement: NIHMS1598385-supplement-5.pdf [file NIHMS1598385-supplement-5.pdf]

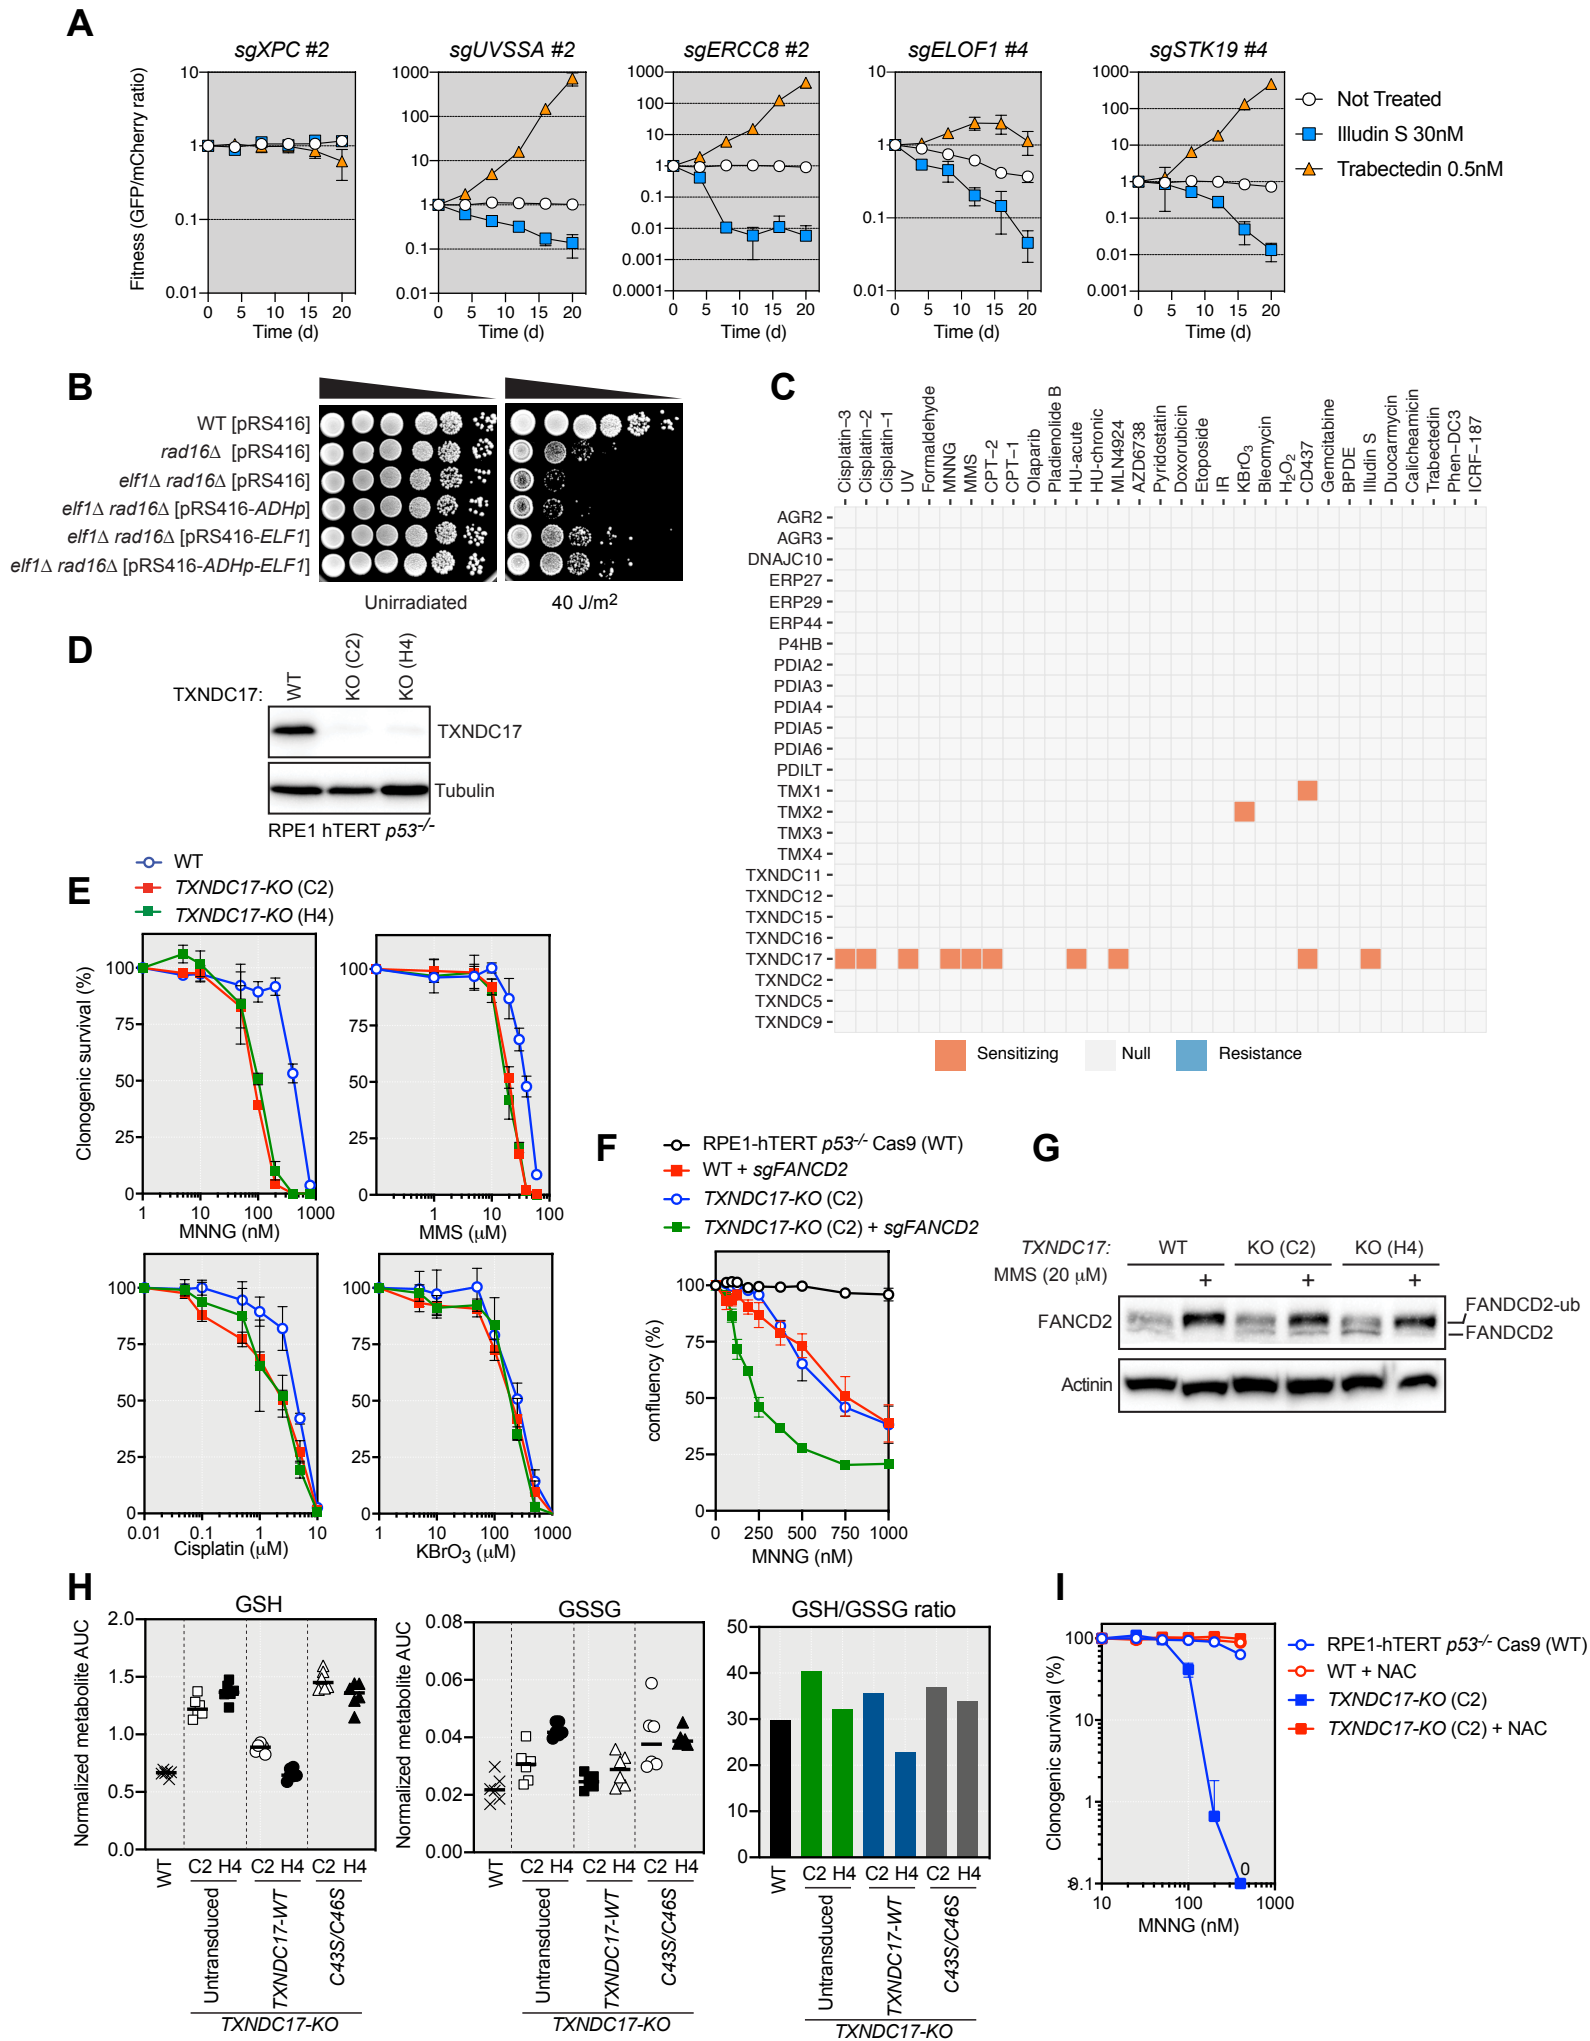

Figure S6

Supplement: NIHMS1598385-supplement-6.pdf [file NIHMS1598385-supplement-6.pdf]

**A**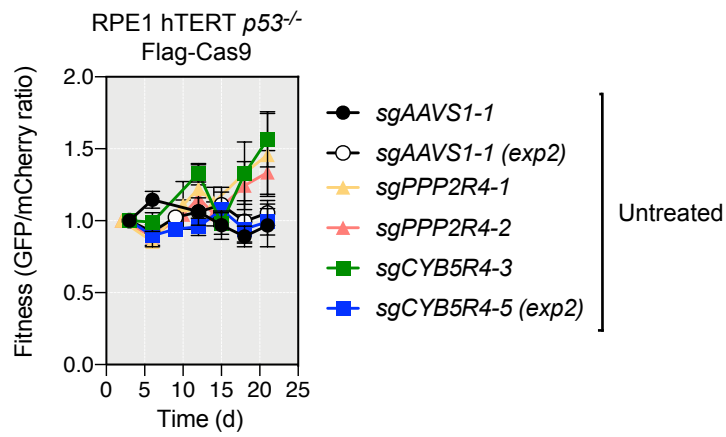**B**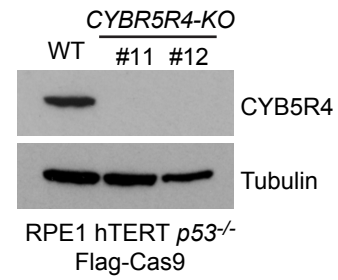**C**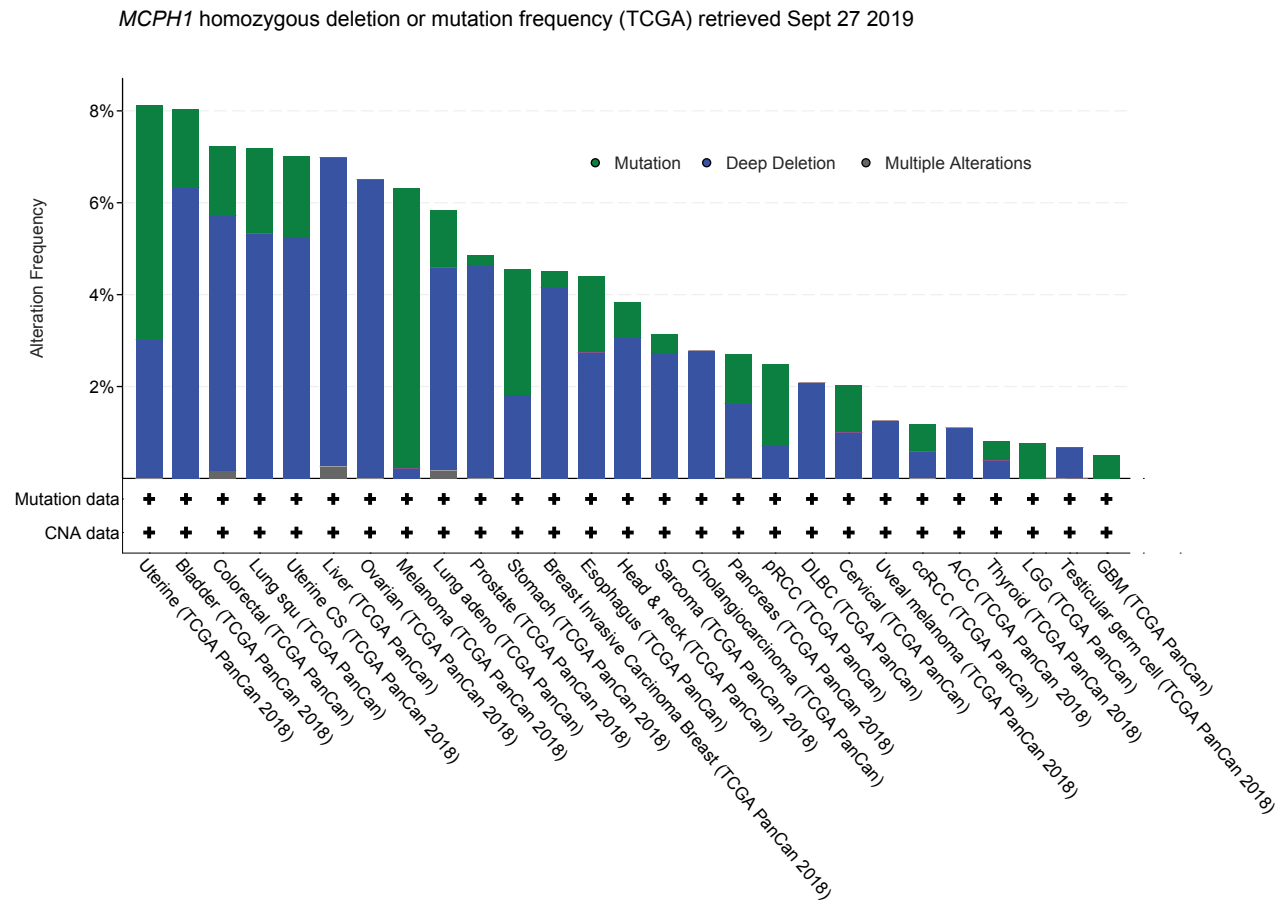

Figure S7

Supplement: NIHMS1598385-supplement-7.pdf [file NIHMS1598385-supplement-7.pdf]
